# Supplementary material for: Water promoted allylic nucleophilic substitution reactions of (E)-1,3 diphenylallyl acetate
Source: Royal Society of Chemistry journal article supplement (doi:10.1039/c7gc03123h), 2017-11-30

## Supporting Information

### Water promoted allylic nucleophilic substitution reactions of (*E*)-1,3 diphenylallyl acetate

Seema A. Ghorpade<sup>a, b</sup>, Dinesh N. Sawant<sup>\*a</sup>, Arwa Makki<sup>a</sup>,  
Nagaiyan Sekar<sup>\*b</sup> and Jorg Eppinger<sup>\*a</sup>

<sup>a</sup>King Abdullah University of Science and Technology, Division of Physical Sciences & Engineering and KAUST Catalysis Center (KCC), Thuwal 23955-6900, Saudi Arabia.

<sup>b</sup>Department of Dyestuff Technology, Institute of Chemical Technology (Deemed University), N. Parekh Marg, Matunga, Mumbai-400019, Maharashtra, India.

E-mail: jorg.eppinger@kaust.edu.sa (J. E.); dinesh1.sawant@gmail.com (D.N. S),  
n.sekar@ictmumbai.edu.in (N. S.)

#### INDEX

| Sr. no. | Content                                              | Page no. |
|---------|------------------------------------------------------|----------|
| 1       | General information                                  | 1        |
| 2       | General experimental procedure                       | 1        |
| 3       | Time study                                           | 2        |
| 4       | Effect of water volume                               | 3        |
| 5       | Scale up of allylic alkylation                       | 3        |
| 6       | Spectroscopic data of product                        | 4-7      |
| 7       | References                                           | 7        |
| 8       | <sup>1</sup> H, <sup>13</sup> C NMR and Mass Spectra | 8-20     |

## 1. General information:

All reactions were carried out under air atmosphere. Thin-layer chromatography (TLC) was performed on silica coated glass plates (silica gel 60) with detection by irradiation of 254 nm UV light. Product was purified by Flash column chromatography on silica gel (60-120) mesh using solvent combination of hexan and ethyl acetate. All yields reported in Table 4 referred to isolated yields and pure as determined by NMR and GCMS analysis. While yields reported in Table 1-3 are GC yields referenced to diglyme as internal standard. GS-MS analysis was performed on a Agilent Agilent 7890A GC System with Agilent 5975C XL EI/CI MSD with Triple Axis Detector. <sup>1</sup>H NMR and <sup>13</sup>C NMR spectra were recorded on a Bruker AV-400 spectrometer at 295 K. in CDCl<sub>3</sub>. Chemical shifts are reported in parts per million ( $\delta$ ) relative to tetramethylsilane (TMS) as internal standard or to the used solvent (in case of product **3a** and **3l** additional TMS externally added). *J* (coupling constant) were reported in Hz, splitting patterns of proton are described as s (singlet), d (doublet), t (triplet), m (multiplet) etc. All products obtained and discussed in this work have been previously reported except compound **3h** and characterized by suitable technique such as <sup>1</sup>H NMR, <sup>13</sup>C NMR, GC-MS, and were compared with previously reported data.

## 2. General experimental procedure for allylic alkylation.

In 10 mL round bottom flask water (2 mL) is added then sodium ter-butoxide (**2**, 0.40 mmol) added then acetylacetone (**2a**, 0.40 mmol) is added and reaction mixture stirred for 10 minutes at room temperature. Finally (*E*)-1,3-diphenylallyl acetate (**1a**, 0.20 mmol) is added and after addition the round bottom flask was placed in oil bath and magnetically stirred at 50 °C for 24 hours under air atmosphere. After 24 hours, the reaction mixture was cooled to room temperature. Then the product was extracted with ethyl acetate (4 x 10 mL). The combined organic layers were dried over Na<sub>2</sub>SO<sub>4</sub> and evaporated to afford the crude product. Finally, product was purified by column chromatography on silica gel to afford the pure product **3a**. The product was confirmed by at least two or one of the analytical techniques among GC-MS, <sup>1</sup>H NMR, <sup>13</sup>C NMR, spectroscopic analysis.

### 3. General experimental procedure for *O*-allylation and allylic amination

In 10 mL round bottom flask water (2 mL) is added then corresponding nucleophile (**2**, 0.40 mmol) is added and stirred reaction mixture for 10 minutes at room temperature. Finally (*E*)-1,3-diphenylallyl acetate (**1a**, 0.20 mmol) is added and after addition the round bottom flask was placed in oil bath and magnetically stirred at 50 °C for 24 h (for amines 16 h) under air atmosphere. After completion, the reaction mixture was cooled to room temperature. Then the product was extracted with ethyl acetate (4 x 10 mL). The combined organic layers were dried over Na<sub>2</sub>SO<sub>4</sub> and evaporated to afford the crude product. Finally, product was purified by column chromatography on silica gel to afford the pure product **3**. The product was confirmed by at least two or one of the analytical techniques among GC-MS, <sup>1</sup>H NMR, <sup>13</sup>C NMR, spectroscopic analysis.

**Table 1.** Time Study<sup>a</sup>

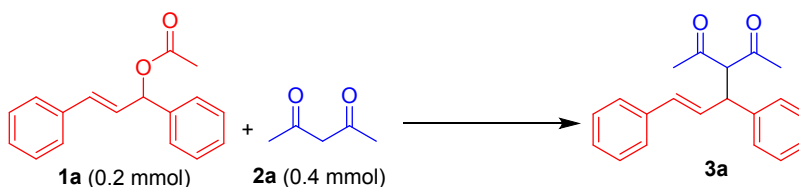

| Entry | Time (h) | <b>3a</b> Yield (%) <sup>b</sup> |
|-------|----------|----------------------------------|
| 1     | 3        | 9                                |
| 2     | 6        | 21                               |
| 3     | 9        | 35                               |
| 4     | 12       | 58                               |
| 5     | 15       | 64                               |
| 6     | 18       | 70                               |
| 7     | 21       | 89                               |
| 8     | 24       | 94                               |
| 9     | 27       | 98                               |

<sup>a</sup>Reaction Conditions: **1a** (0.20 mmol), **2a** (0.40 mmol), NaOtBu (0.20 mmol), water (2 mL), 50 °C, under air atmosphere. <sup>b</sup>GC yield.

**Table 2** Effect of Water volume<sup>a</sup>

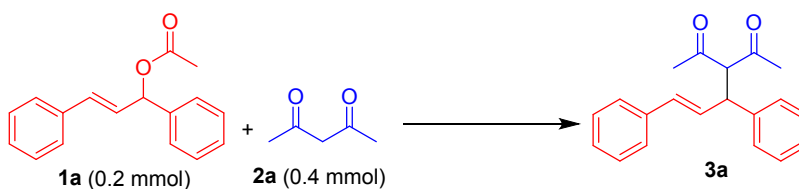

| Entry | Water (mL) | <b>3a</b> Yield (%) <sup>b</sup> |
|-------|------------|----------------------------------|
| 1     | 0.5        | 38                               |
| 2     | 1          | 57                               |
| 3     | 2          | 94                               |
| 4     | 4          | 97                               |

<sup>a</sup>Reaction Conditions: **1a** (0.20 mmol), **2a** (0.40 mmol), NaOtBu (0.20 mmol), Water, 50 °C, 24 h, under air atmosphere. <sup>b</sup>GC yield.

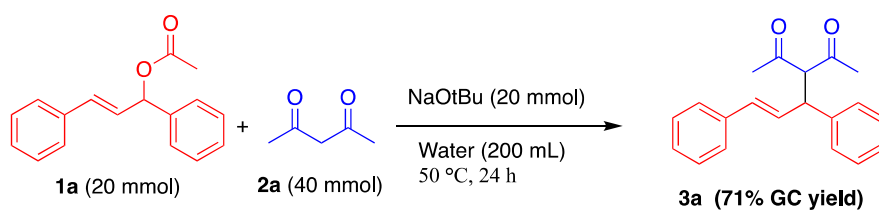

Product separates by simple extraction without any solvent

**Scheme 1:** Scale up of allylic alkylation to 20 mmol scale.

#### 4. Spectroscopic data of product:

(3a) (*E*)-3-(1,3-diphenylallyl)pentane-2,4-dione<sup>1</sup>

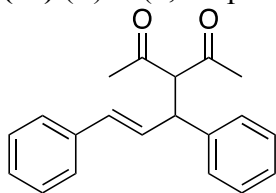

**<sup>1</sup>H NMR (400 MHz, Chloroform-*d*):**  $\delta$  1.92 (s, 3 H), 2.25 (s, 3 H), 4.33–4.34 (m, 2 H), 6.19 (dd,  $J = 5.2, 15.8$  Hz, 1 H), 6.48 (d,  $J = 15.8$  Hz, 1 H), 7.18–7.33 (m, 10 H).

**<sup>13</sup>C NMR (100 MHz, Chloroform-*d*):**  $\delta$  29.71, 30.00, 49.17, 74.54, 126.36, 127.27, 127.71, 127.92, 128.52, 129.02, 131.68, 136.55, 140.10, 202.66, 202.82.

(3b) (*E*)-(3-phenoxyprop-1-ene-1,3-diyl)dibenzene<sup>2</sup>

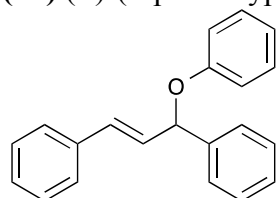

**<sup>1</sup>H NMR (400 MHz, Chloroform-*d*):**  $\delta$  5.71 (d,  $J = 6.3$  Hz, 1H), 6.35 (dd,  $J = 15.9, 6.3$  Hz, 1H), 6.58 (d,  $J = 16.0$  Hz, 1H), 6.82 (t,  $J = 7.3$  Hz, 1H), 6.89 (d,  $J = 7.8$  Hz, 2H), 7.24 – 7.08 (m, 6H), 7.32 – 7.23 (m, 5H), 7.41 – 7.33 (m, 2H).

**<sup>13</sup>C NMR (100 MHz, Chloroform-*d*):**  $\delta$  80.84, 116.37, 121.17, 126.78, 126.79, 127.99, 128.00, 128.66, 128.83, 129.44, 129.50, 131.63, 136.47, 140.48, 158.06.

(3c) (*E*)-1,3-diphenyl-N-(prop-2-yn-1-yl)prop-2-en-1-amine<sup>3</sup>

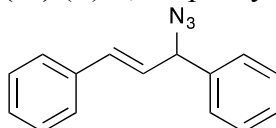

**GC-MS  $m/z$  (% relative intensity):** 208 (10), 207 (67), 206 (100), 130 (57), 103 (18), 102 (10), 91 (10), 89 (11), 77 (27), 51 (10).

**<sup>1</sup>H NMR (400 MHz, Chloroform-*d*):**  $\delta$  5.14 (d,  $J = 7.2$  Hz, 1H), 6.22 (dd,  $J = 15.7, 7.3$  Hz, 1H), 6.64 (d,  $J = 15.7$  Hz, 1H), 7.36 – 7.16 (m, 10H).

(3d) (*E*)-3-(1,3-diphenylallyl)-1*H*-indole<sup>4</sup>

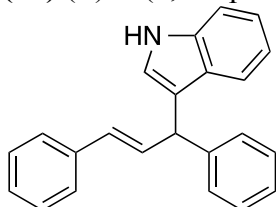

**GC-MS  $m/z$  (% relative intensity):** 309 ( $M^+$ , 100), 308 (39), 232 (34), 206 (28), 204 (21), 192 (20), 191 (20), 130 (21), 115 (19).

**<sup>1</sup>H NMR (400 MHz, Chloroform-*d*):**  $\delta$  5.20 (d,  $J = 7.3$  Hz, 1H), 6.52 (d,  $J = 15.9$  Hz,

1H), 6.81 (dd,  $J = 15.8, 7.4$  Hz, 1H), 6.96 (s, 1H), 7.10 (t,  $J = 7.1$  Hz, 1H), 7.19-7.57 (m, 13H), 8.07 (s, 1H).

(3e) (*E*)-*N*-benzyl-1,3-diphenylprop-2-en-1-amine<sup>5</sup>

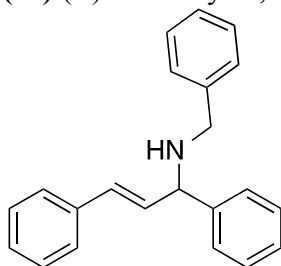

**<sup>1</sup>H NMR (400 MHz, Chloroform-*d*):**  $\delta$  3.79 (s, 2H), 4.40 (d,  $J = 7.5$  Hz, 1H), 6.35 (dd,  $J = 15.8, 7.5$  Hz, 1H), 6.57 (d,  $J = 15.8$  Hz, 1H), 7.16-7.49 (15 H).

**<sup>13</sup>C NMR (100 MHz, Chloroform-*d*):**  $\delta$  51.31, 64.58, 126.57, 127.18, 127.52, 127.57, 127.63, 128.43, 128.57, 128.62, 128.78, 130.82, 132.22, 136.96, 139.93, 142.51.

(3f) (*E*)-1,3-diphenyl-*N*-(prop-2-yn-1-yl)prop-2-en-1-amine<sup>6</sup>

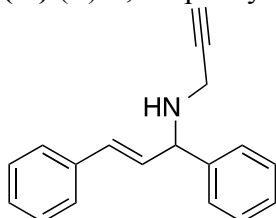

**GC-MS *m/z* (% relative intensity):** 247 ( $M^+$ , 15), 246 (23), 207 (39), 206 (100), 156 (14), 130 (16), 128 (16), 115 (27), 104 (24), 103 (17), 77 (27).

**<sup>1</sup>H NMR (400 MHz, Chloroform-*d*):**  $\delta$  2.36 (t,  $J = 2.3$  Hz, 1H), 3.31 (d,  $J = 16.8$  Hz, 1H), 3.47 (d,  $J = 16.8$  Hz, 1H), 4.86 (d,  $J = 8.1$  Hz, 1H), 6.47 (dd,  $J = 15.8, 8.1$  Hz, 1H), 6.62 (s, 1H), 7.33 – 7.18 (m, 10 H).

(3g) (*E*)-*N*-isopropyl-1,3-diphenylprop-2-en-1-amine<sup>7</sup>

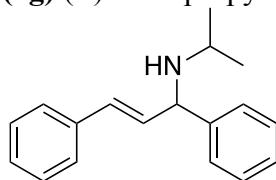

**GC-MS *m/z* (% relative intensity):** 251 ( $M^+$ , 46), 208 (39), 193 (69), 192 (40), 191 (36), 174 (36), 160 (74), 115 (100), 104 (40), 91 (32)

**<sup>1</sup>H NMR (400 MHz, Chloroform-*d*):**  $\delta$  1.05 (dd,  $J = 18.2, 6.3$  Hz, 6H), 2.79 (hept,  $J = 6.3$  Hz, 1H), 4.53 (d,  $J = 7.1$  Hz, 1H), 6.57 – 6.19 (m, 2H), 7.45 – 7.13 (m, 10H).

**(3h)** (*E*)-*N*-(1,3-diphenylallyl)cyclopentanamine

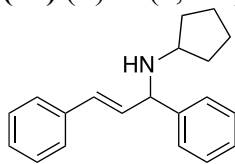

**GC-MS m/z (% relative intensity):** 277 ( $M^+$ , 22), 208 (27), 200 (18), 193 (65), 192 (30), 191 (262), 186 (67), 178 (26), 91 (28).

**$^1\text{H NMR}$  (400 MHz, Chloroform-*d*):**  $\delta$  1.35 (d,  $J = 9.4$  Hz, 4H), 1.65 – 1.50 (m, 2H), 1.85 – 1.73 (m, 2H), 4.39 (d,  $J = 7.5$  Hz, 1H), 3.00 (p,  $J = 7.1$  Hz, 1H), 6.30 (dd,  $J = 15.8, 7.5$  Hz, 1H), 6.48 (d,  $J = 15.8$  Hz, 1H),  $\delta$  7.40 – 7.09 (m, 10H).

**(3i)** (*E*)-1,3-diphenyl-*N*-(prop-2-yn-1-yl)prop-2-en-1-amine<sup>2</sup>

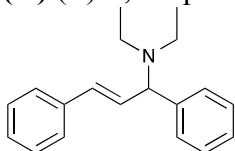

**GC-MS m/z (% relative intensity):** 265 ( $M^+$ , 18), 264 (23), 193 (100), 192 (29), 191 (24), 188 (35), 178 (24), 174 (22), 115 (88), 91 (25).

**$^1\text{H NMR}$  (400 MHz, Chloroform-*d*):**  $\delta$  0.98 (t,  $J = 6.9$  Hz, 6H), 2.64 (s, 4H), 4.25 (d,  $J = 8.4$  Hz, 1H), 6.31 (dd,  $J = 15.8, 6.5$  Hz, 1H), 6.48 (d,  $J = 15.7$  Hz, 1H), 7.34 – 7.11 (m, 10H).

**(3j)** (*E*)-4-(1,3-diphenylallyl)morpholine<sup>7</sup>

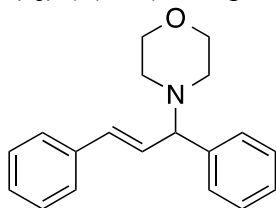

**GC-MS m/z (% relative intensity):** 279 ( $M^+$ , 18), 202 (15), 194 (18), 193 (100), 192 (19), 191 (18), 188 (18), 178 (22), 115 (83), 91 (24).

**$^1\text{H NMR}$  (400 MHz, Chloroform-*d*):**  $\delta$  2.25-2.58 (m, 4H), 3.63-3.85 (m, 5H), 6.36-6.16 (m, 1H), 6.50 (d,  $J = 15.8$  Hz, 1H), 7.11-7.37 (m, 10 H).

**(3k)** (*E*)-(3-methoxyprop-1-ene-1,3-diyl)dibenzene<sup>4</sup>

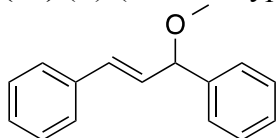

**GC-MS m/z (% relative intensity):** 224 ( $M^+$ , 100), 223 (76), 193 (45), 192 (86), 191 (59), 178 (30), 115 (94), 105 (55), 91 (37), 77 (47).

**$^1\text{H NMR}$  (400 MHz, Chloroform-*d*):**  $\delta$  3.38 (s, 3 H), 4.80 (d,  $J = 7.0$  Hz, 1 H), 6.28 (dd,  $J = 7.0, 15.8$  Hz, 1 H), 6.60 (d,  $J = 15.8$  Hz, 1 H), 7.19-7.46 (m, 10 H).

(3l) (*E*)-3-ethoxy-1, 3-diphenylprop-1-ene<sup>24</sup>

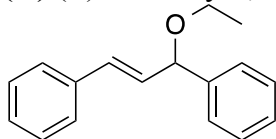

**GC-MS m/z (% relative intensity):** 238 (M<sup>+</sup>, 91), 237 (44), 194 (28), 193 (46), 192 (44), 191 (34), 178 (28), 115 (55), 105 (100), 77 (29).

**<sup>1</sup>H NMR (400 MHz, Chloroform-*d*):**  $\delta$  1.19 (t, *J* = 7.0 Hz, 3H), 3.55 – 3.37 (m, 2H), 4.85 (d, *J* = 7.0 Hz, 1H), 6.23 (d, *J* = 15.9 Hz, 1H), 6.53 (d, *J* = 15.8 Hz, 1H), 7.39 – 7.11 (m, 10H).

(3m) (*E*)-(3-butoxyprop-1-ene-1,3-diyl)dibenzene<sup>8</sup>

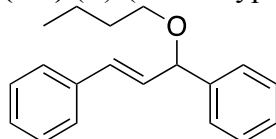

**GC-MS m/z (% relative intensity):** 266 (M<sup>+</sup>, 42), 210 (18), 194 (22), 193 (35), 192 (32), 191 (26), 178 (21), 115 (47), 105 (100), 91 (19).

(3n) (*E*)-3-ethoxy-1, 3-diphenylprop-1-ene<sup>24</sup>

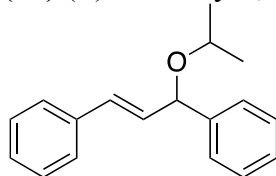

**GC-MS m/z (% relative intensity):** 252 (M<sup>+</sup>), 210, 193, 181, 165, 152.

## 5. References:

1. K. Funabiki, *Tetrahedron* 2009, **65**, 7457.
2. J. Baudoux, *Green Chem.* 2007, **9**, 1346.
3. M. Rueping, C. Vila and U. Uria, *Org. Lett.* 2012, **14**, 768.
4. H. Mo, and W. Bao, *Adv. Synth. Catal.* 2009, **351**, 2845.
5. P. Trillo, A. Baeza and C. Nájera, *J. Org. Chem.* 2012, **77**, 7344.
6. P. Dana, *Adv. Synth. Catal.* 2009, **351**, 1539.
7. T. Nemoto, T. Masuda, Y. Akimoto, T. Fukuyama and Y. Hamada, *Org. Lett.* 2005, **7**, 4447.
8. M. Barbero, S. Cadamuro, S. Dughera and P. Venturello *Synlett* 2007, **14**, 2209



Analytical Spectra's  
(3a) (*E*)-3-(1,3-diphenylallyl)pentane-2,4-dione

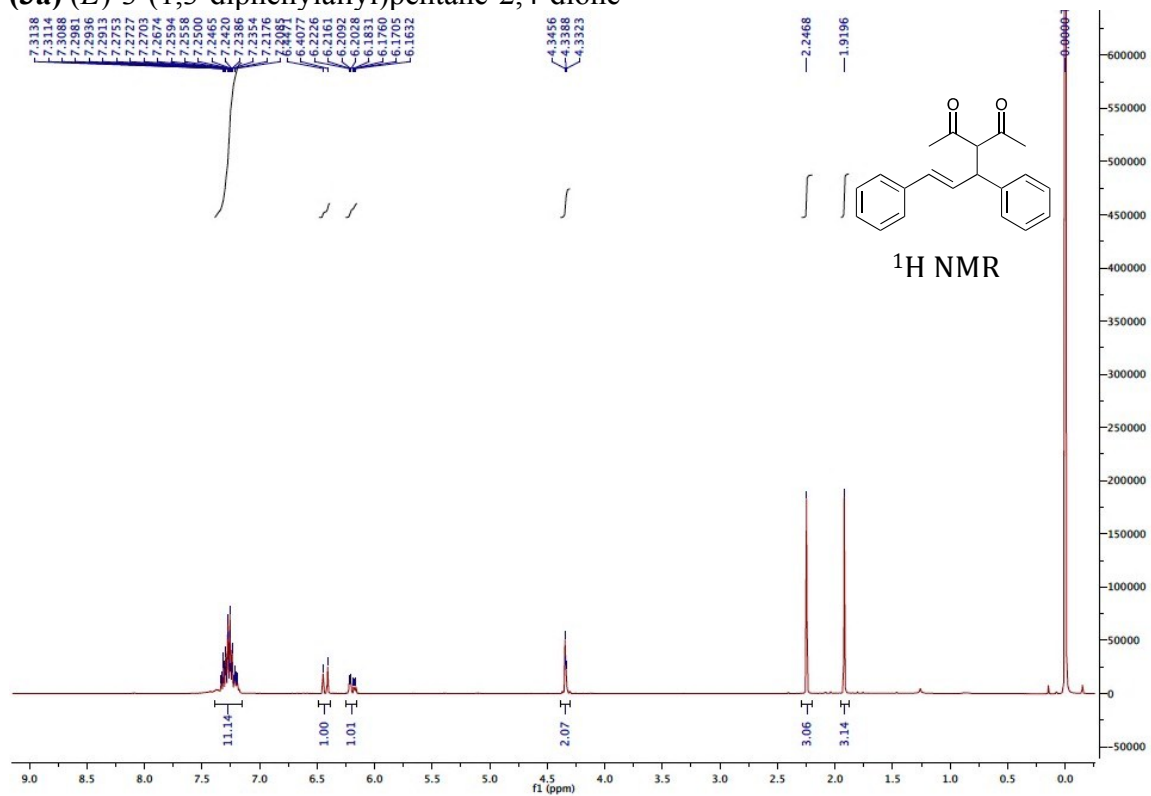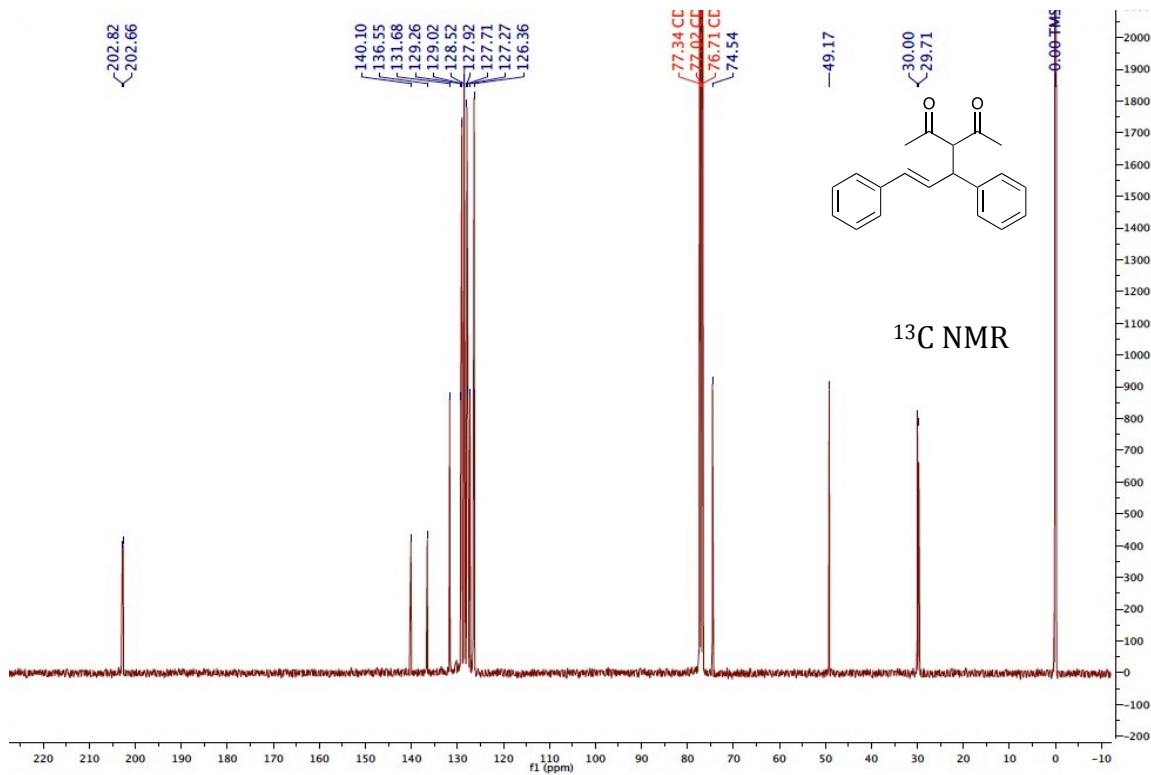

**(3b)** (*E*)-(3-phenoxyprop-1-ene-1,3-diyl)dibenzene

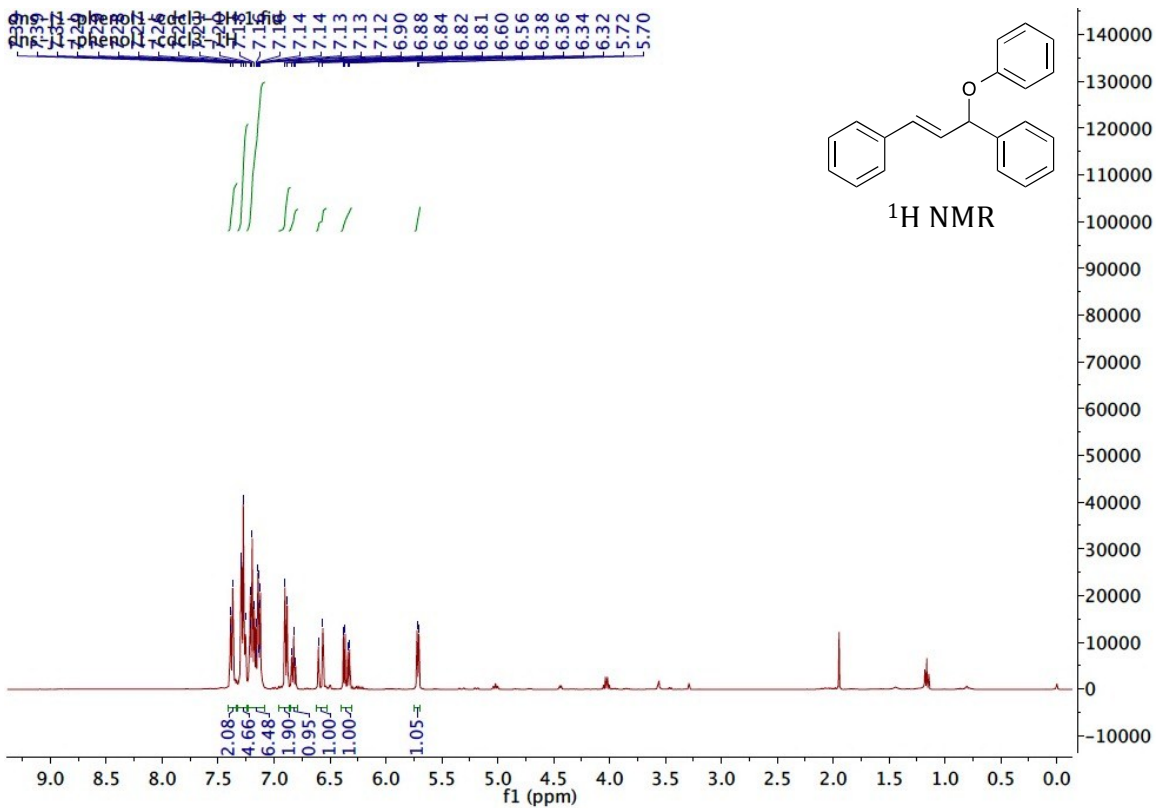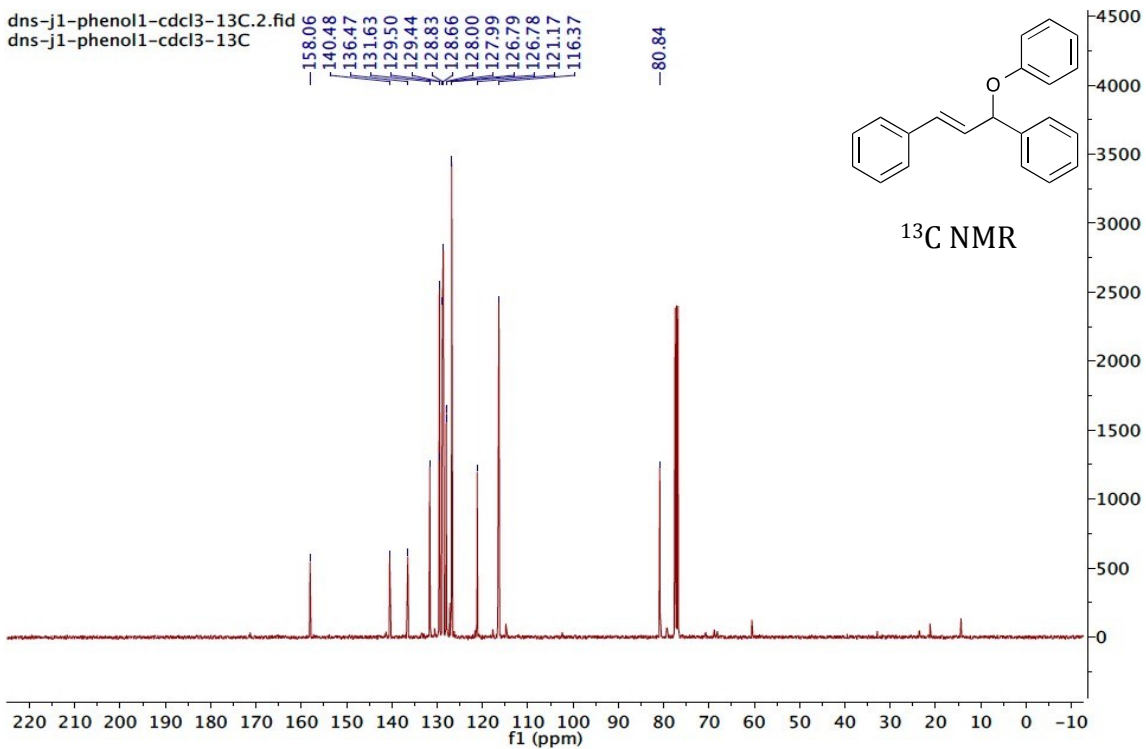

**(3c)** *(E)*-1,3-diphenyl-*N*-(prop-2-yn-1-yl)prop-2-en-1-amine

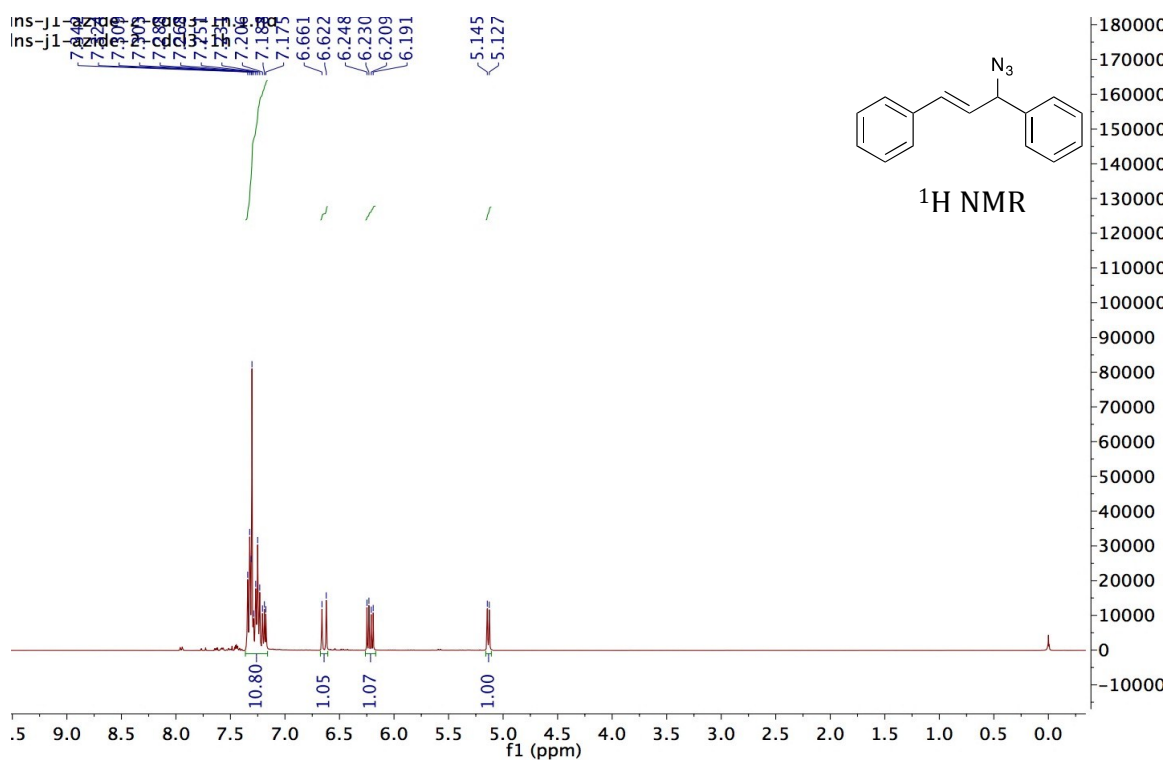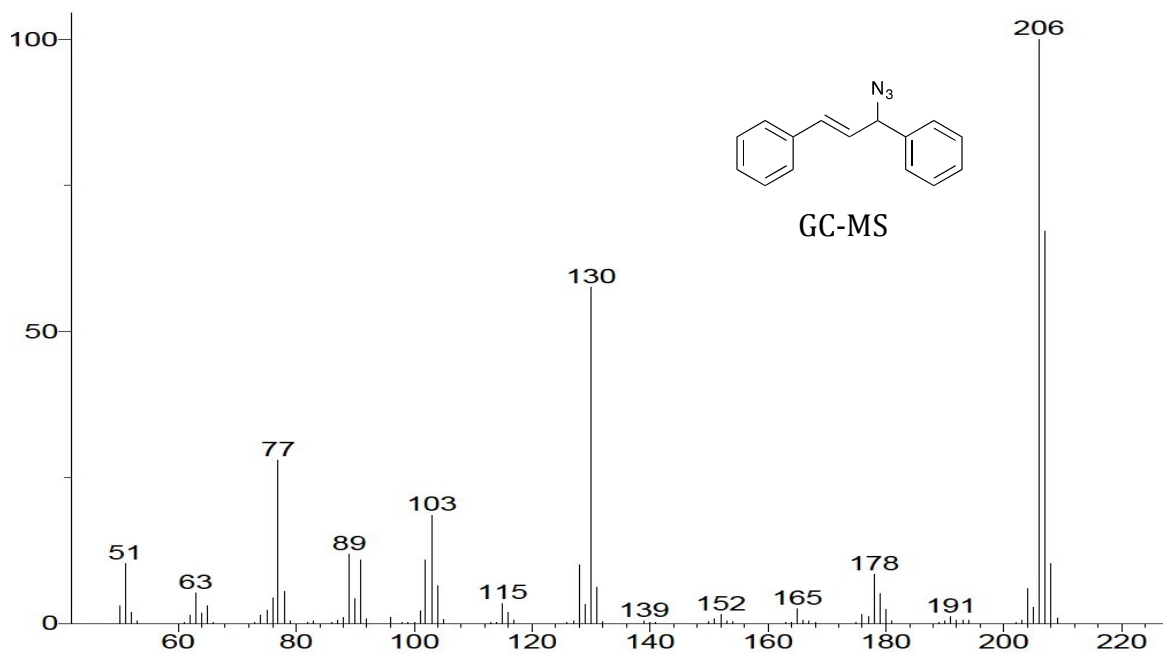

**(3d)** (*E*)-3-(1,3-diphenylallyl)-1*H*-indole

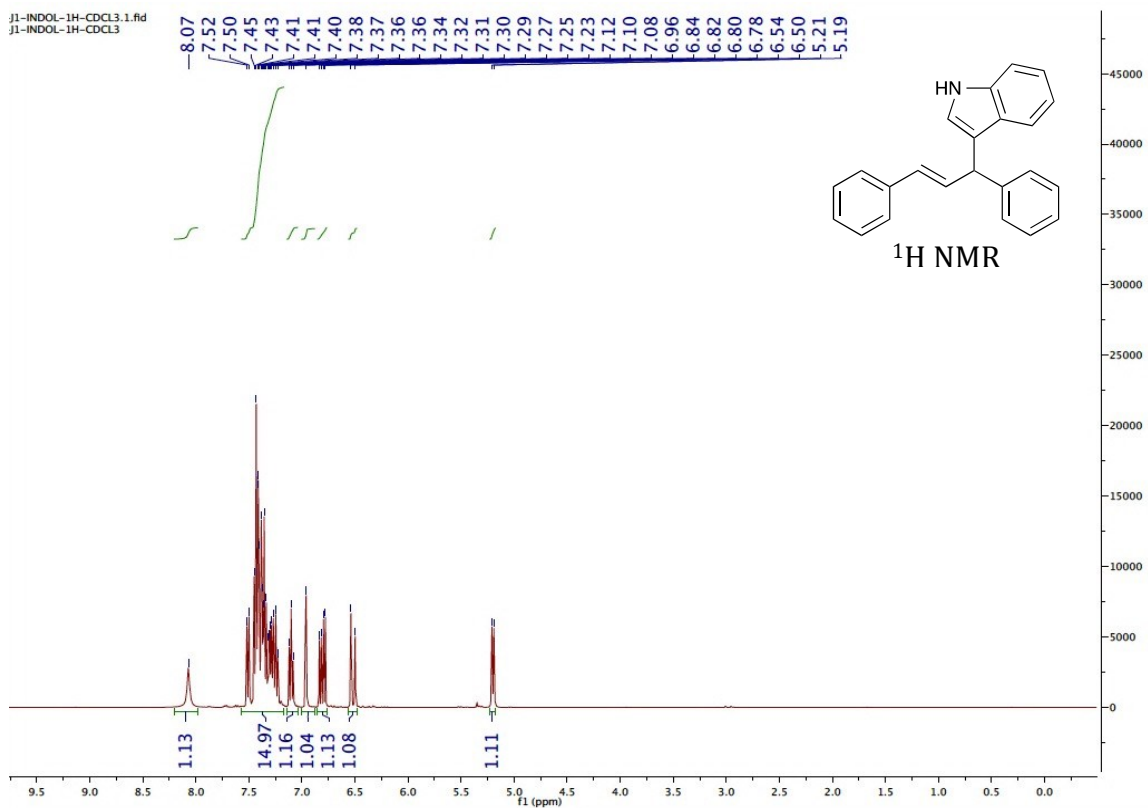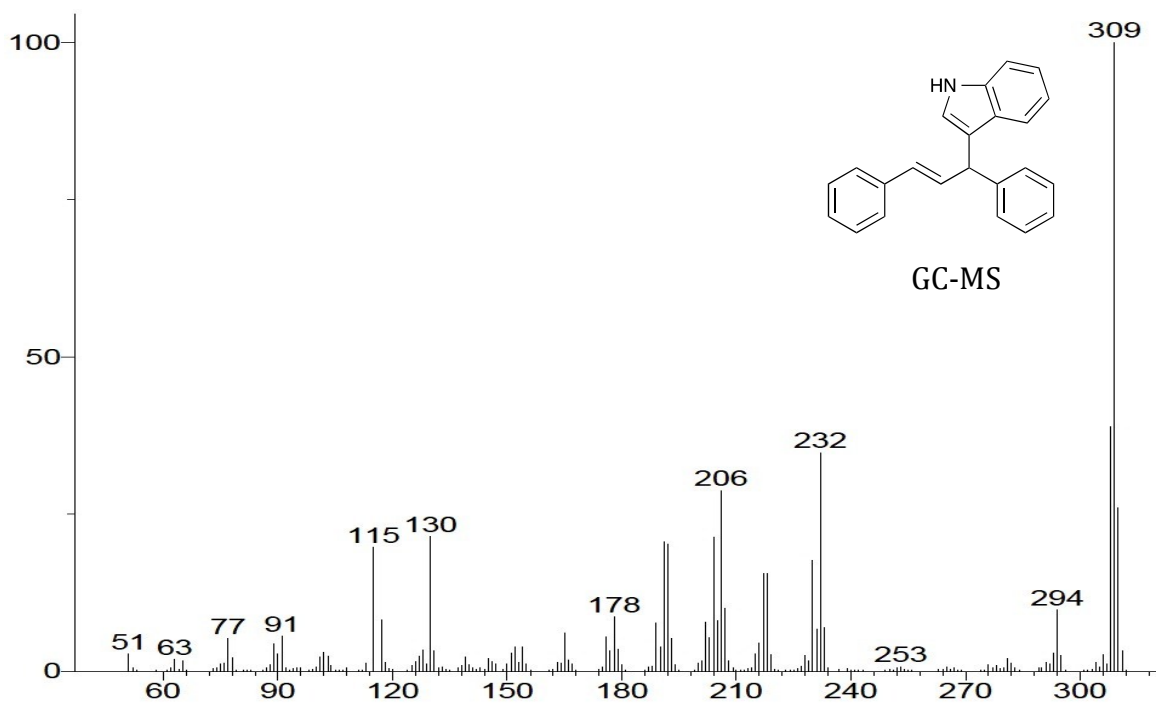

**(3e)** (*E*)-*N*-benzyl-1,3-diphenylprop-2-en-1-amine

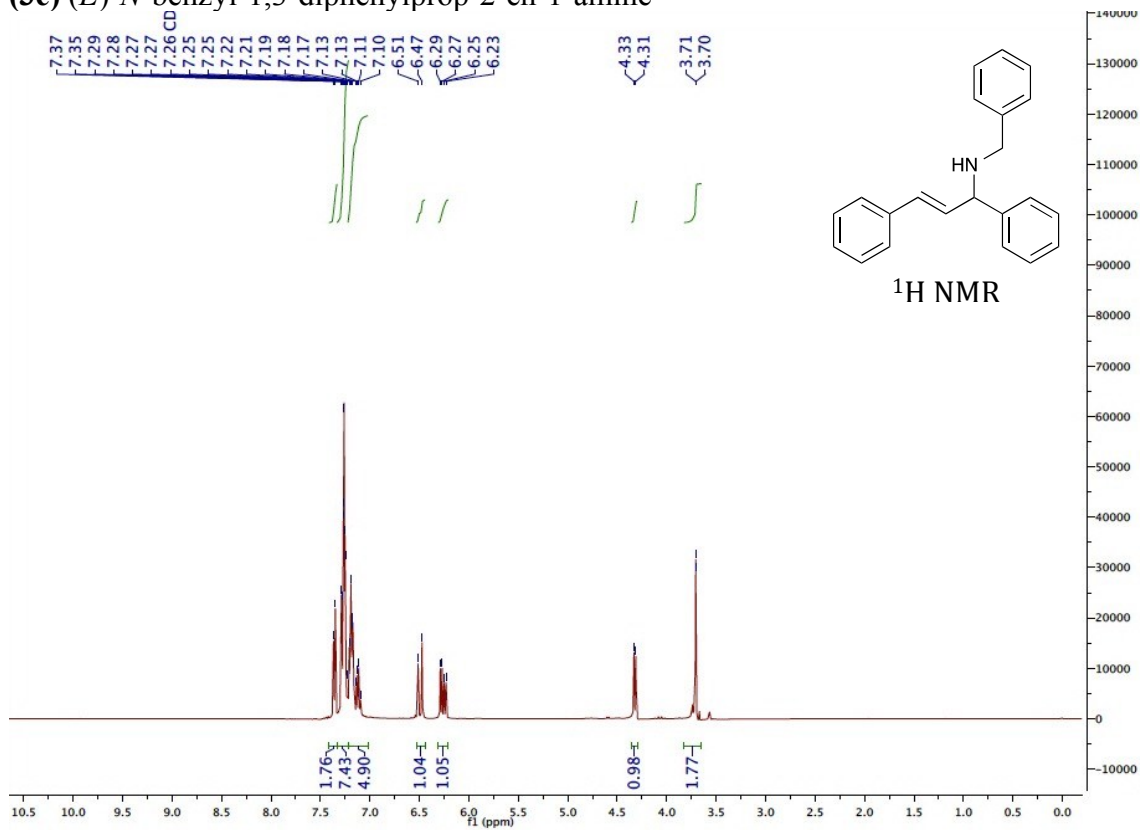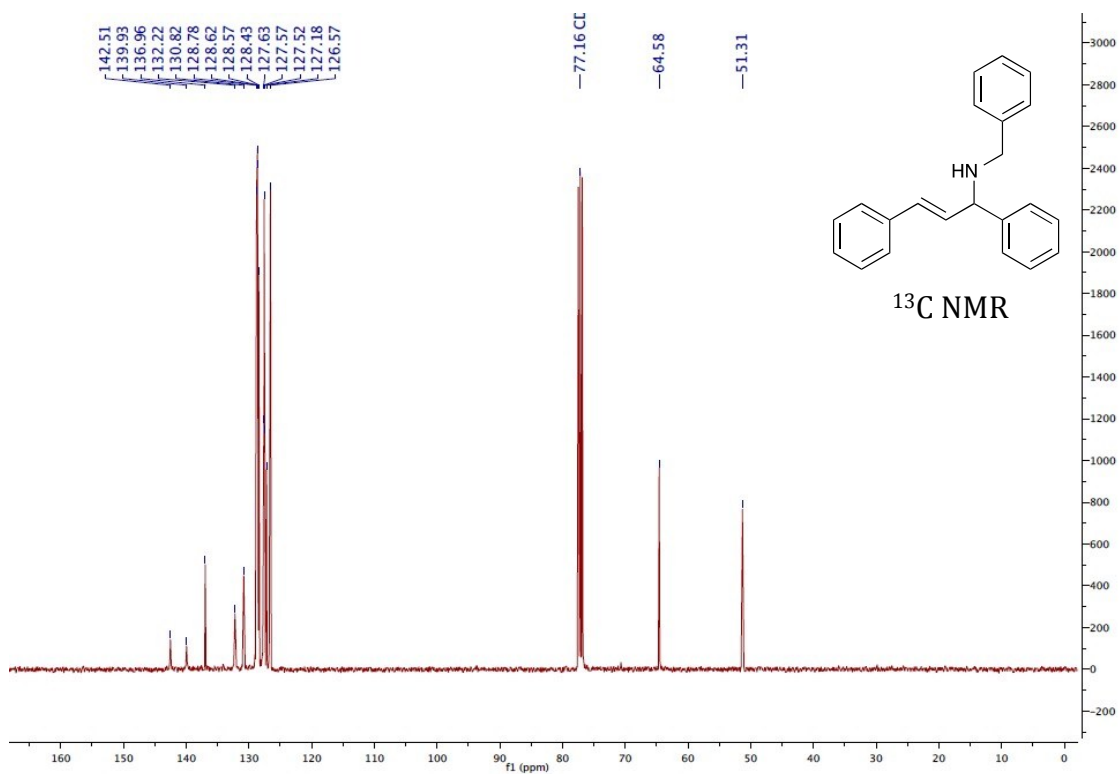

**(3f)** (*E*)-1,3-diphenyl-*N*-(prop-2-yn-1-yl)prop-2-en-1-amine

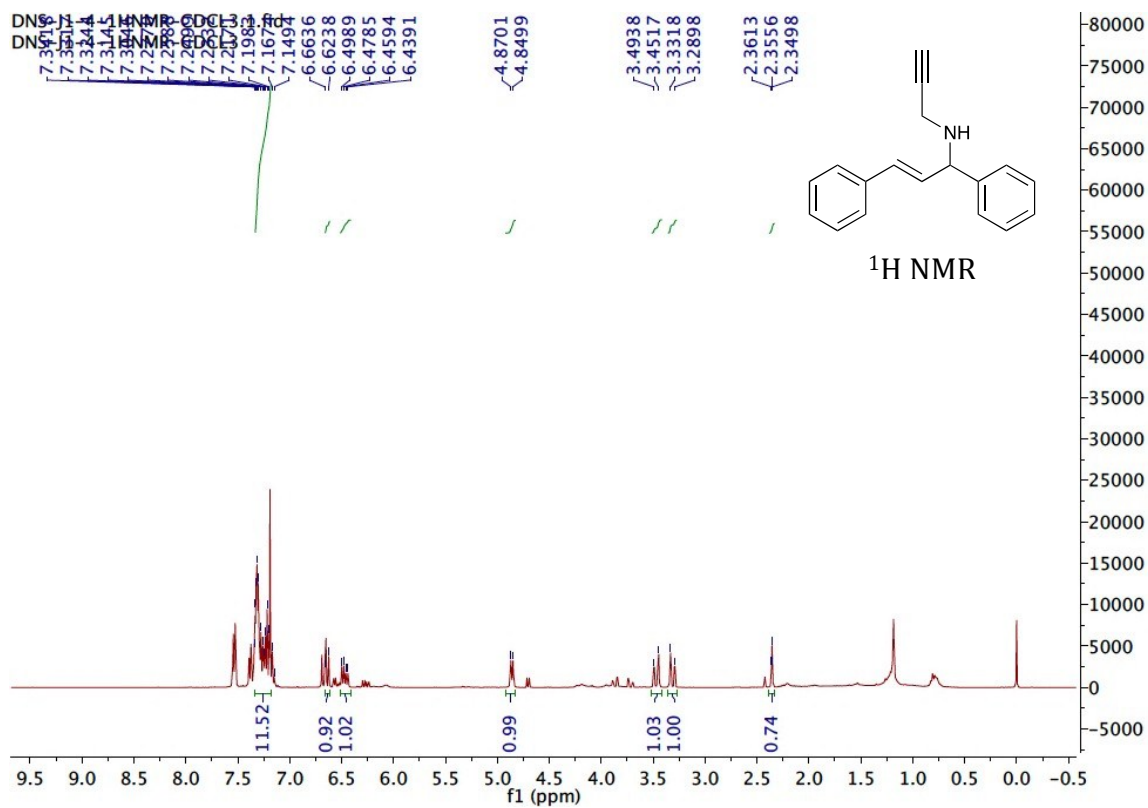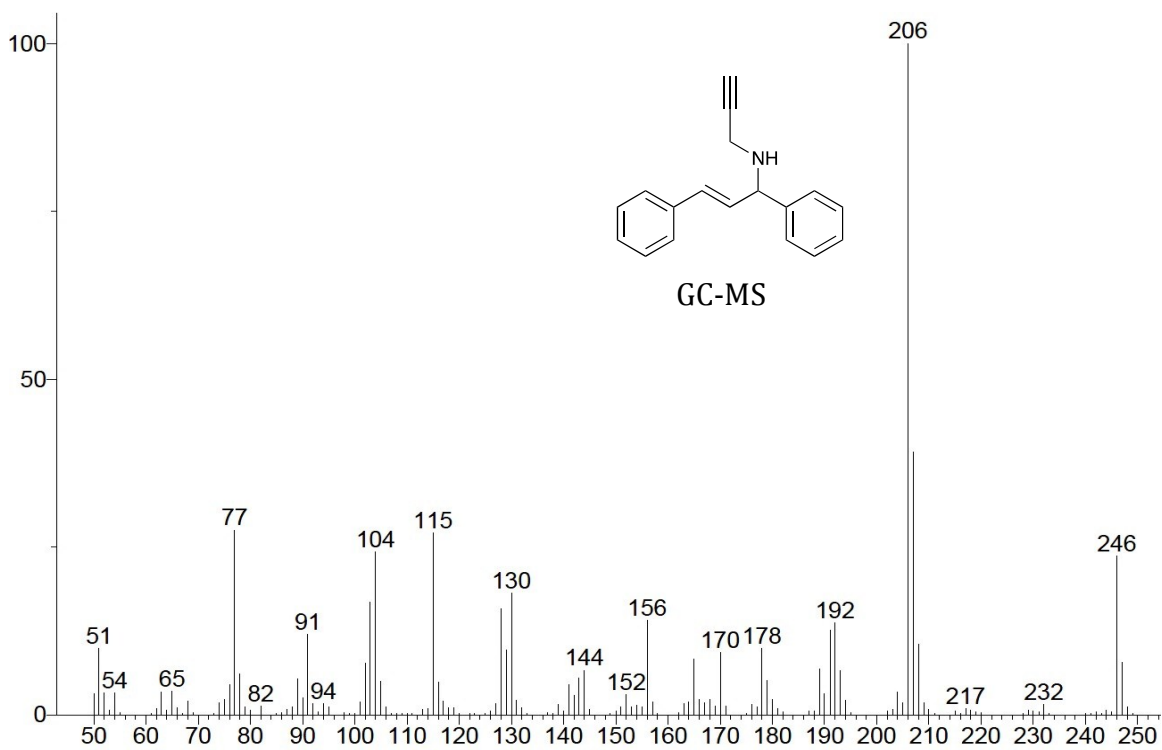

**(3g)** (*E*)-*N*-isopropyl-1,3-diphenylprop-2-en-1-amine

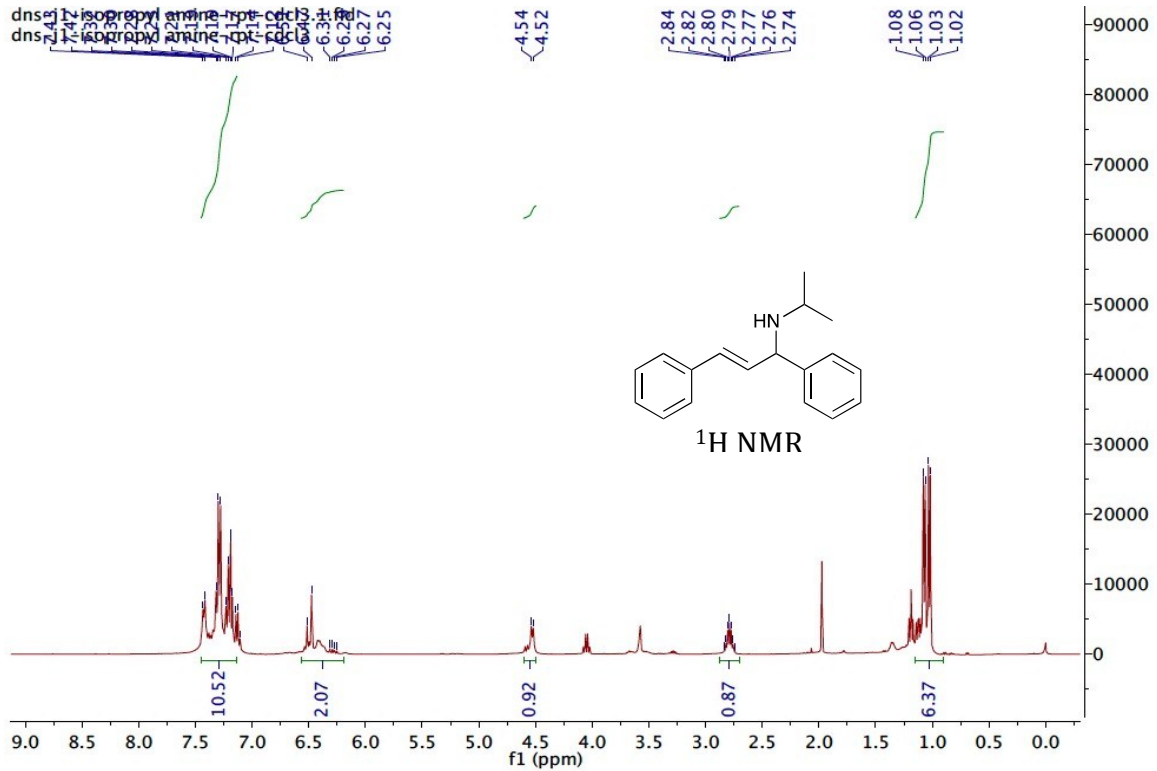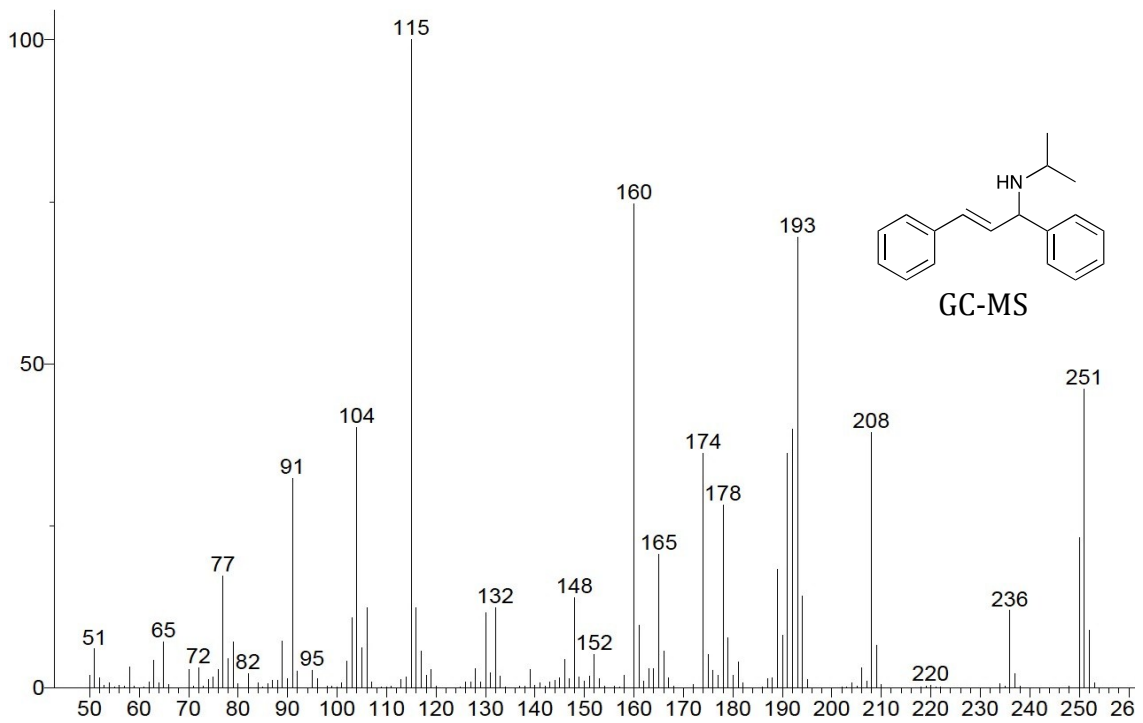

**(3h)** (*E*)-*N*-(1,3-diphenylallyl)cyclopentanamine

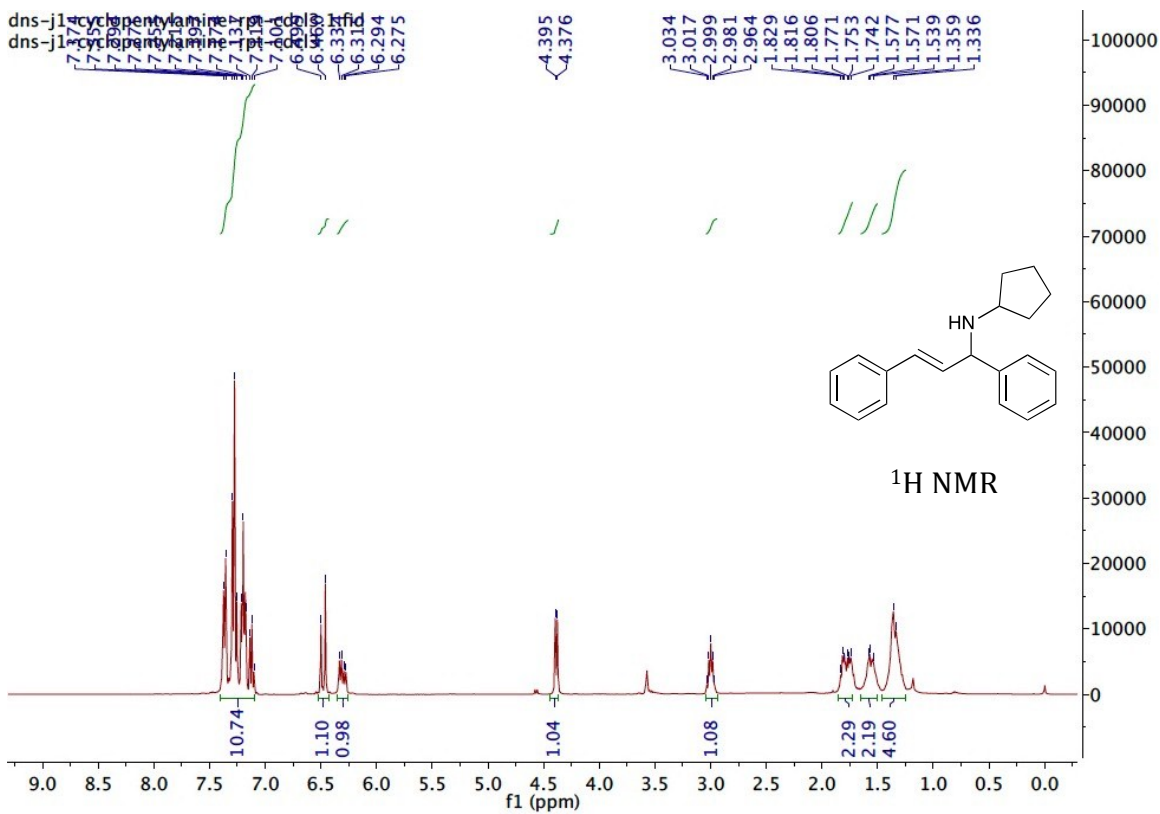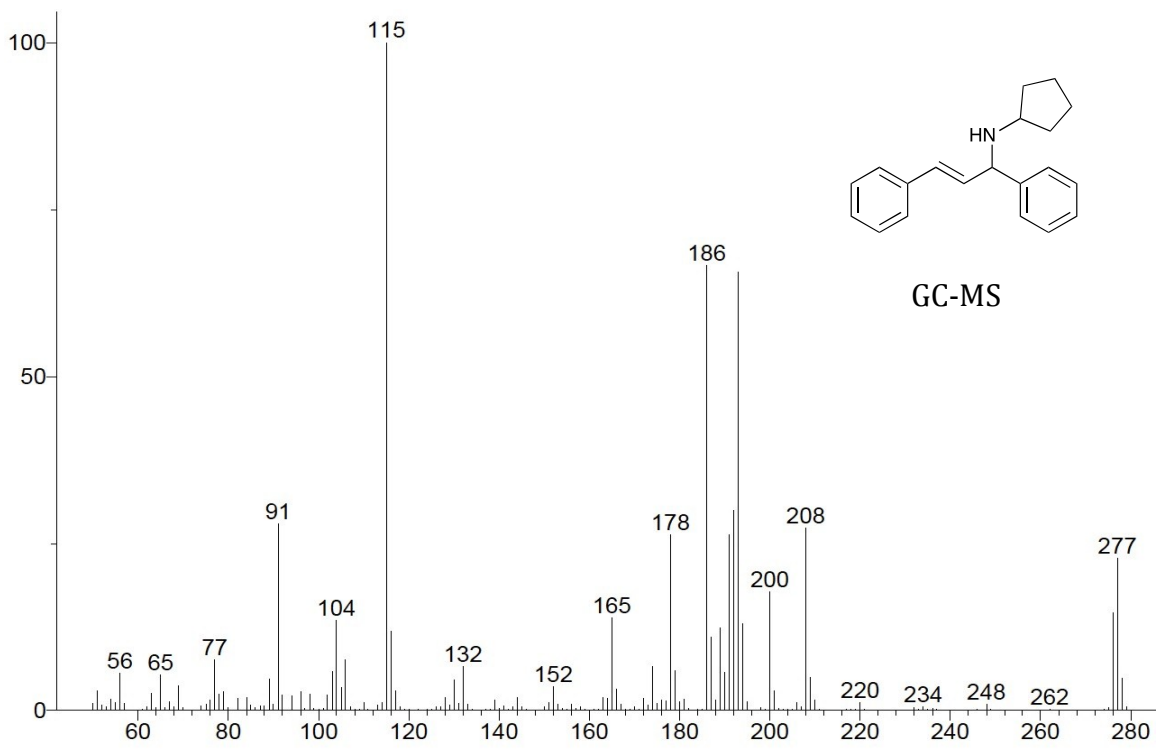



**(3i)** (*E*)-1,3-diphenyl-*N*-(prop-2-yn-1-yl)prop-2-en-1-amine

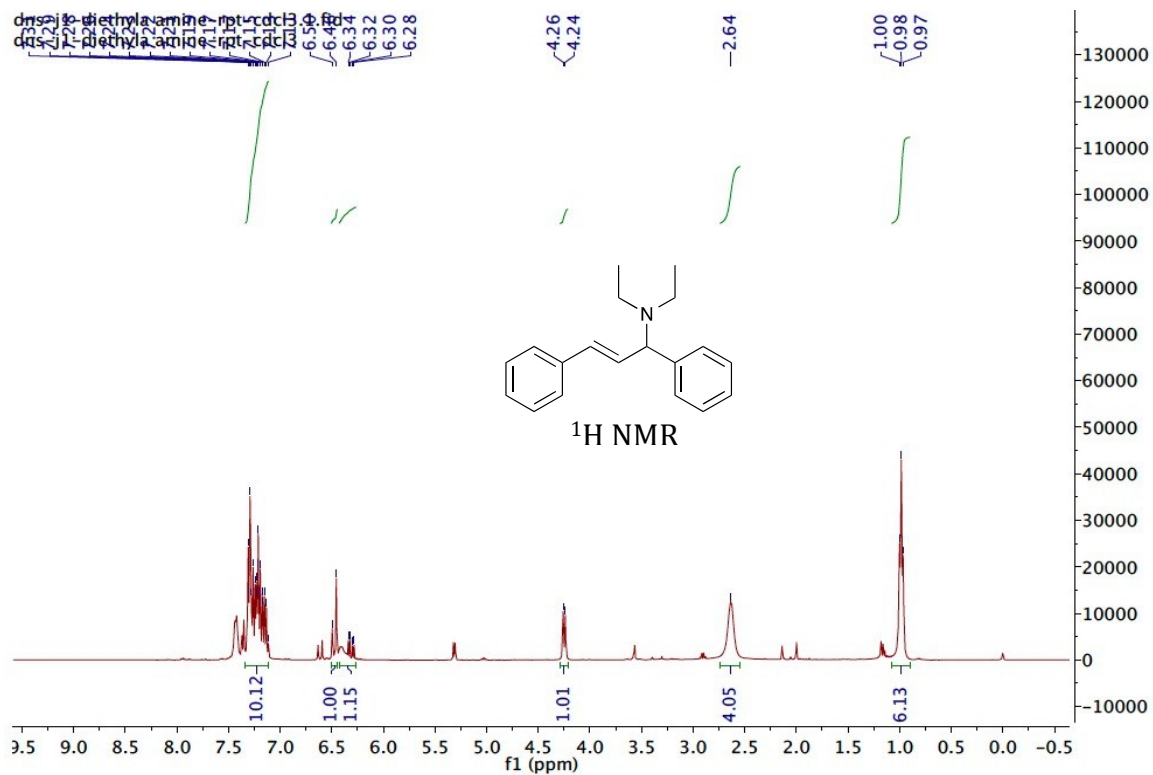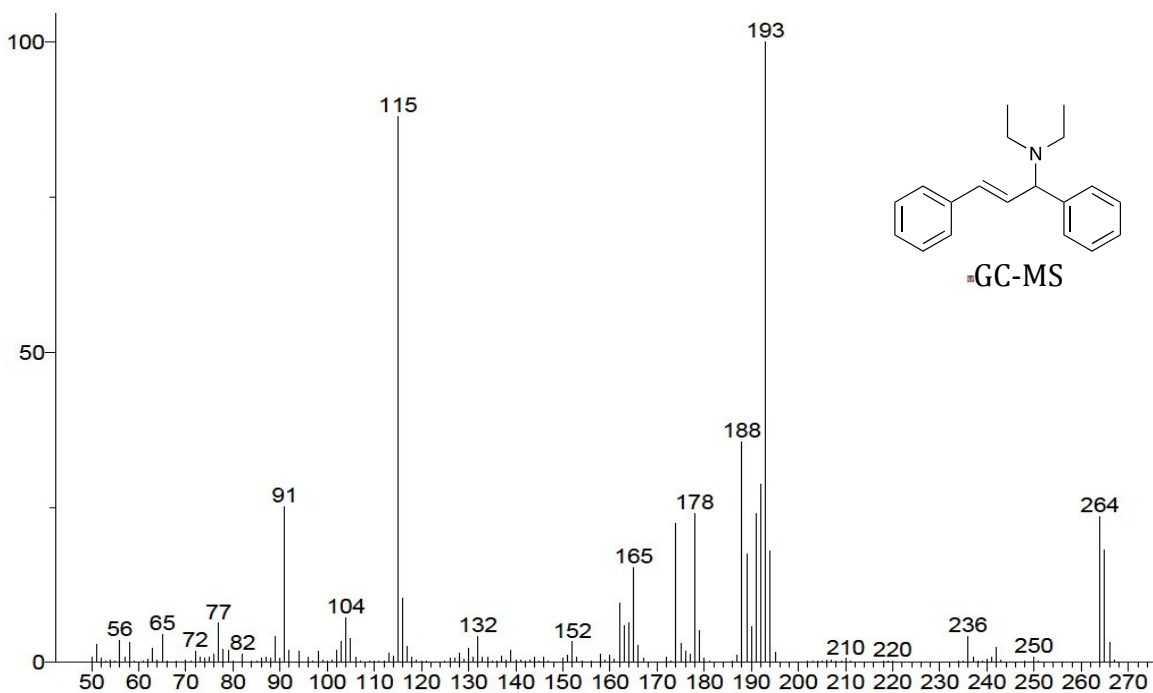

**(3j)** (*E*)-4-(1,3-diphenylallyl)morpholine

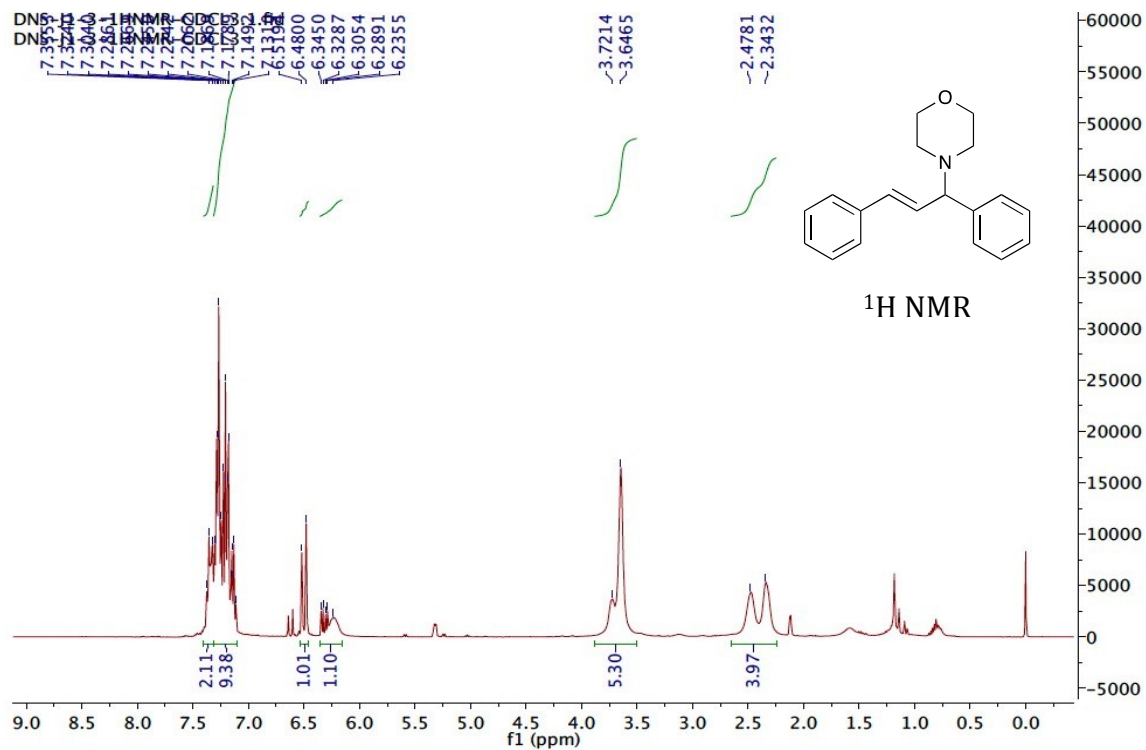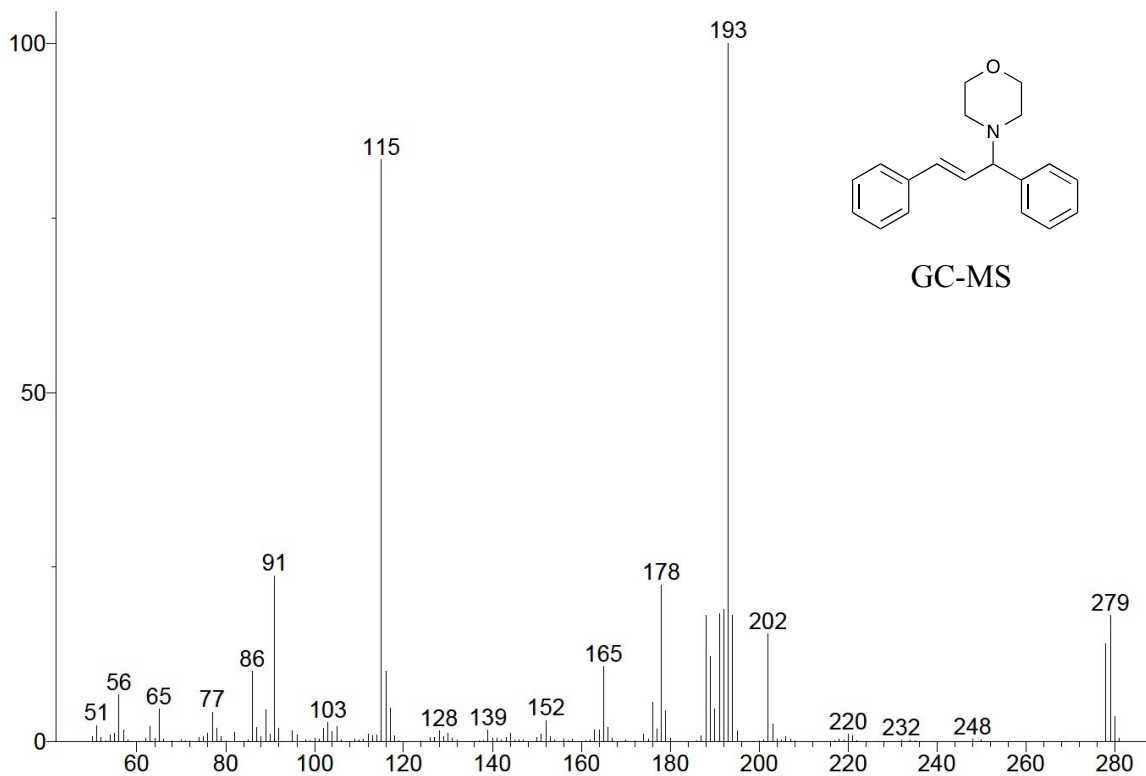

**(3k)** (*E*)-(3-methoxyprop-1-ene-1,3-diyl)dibenzene

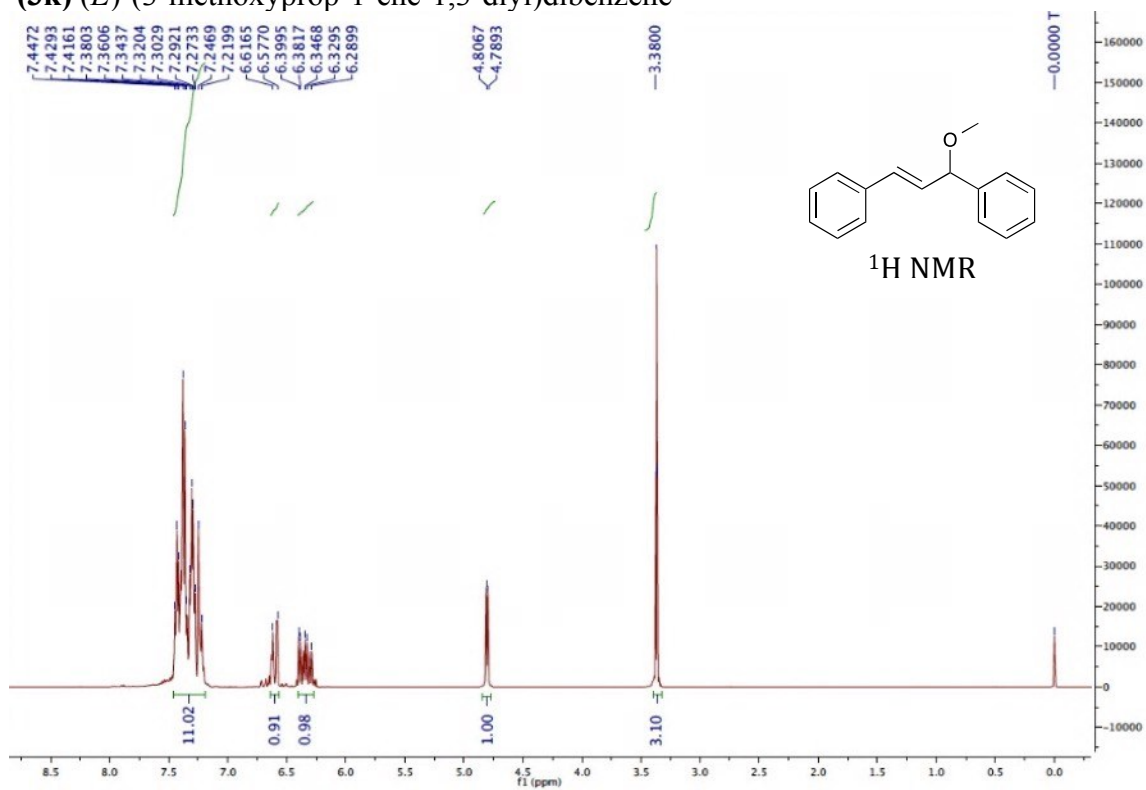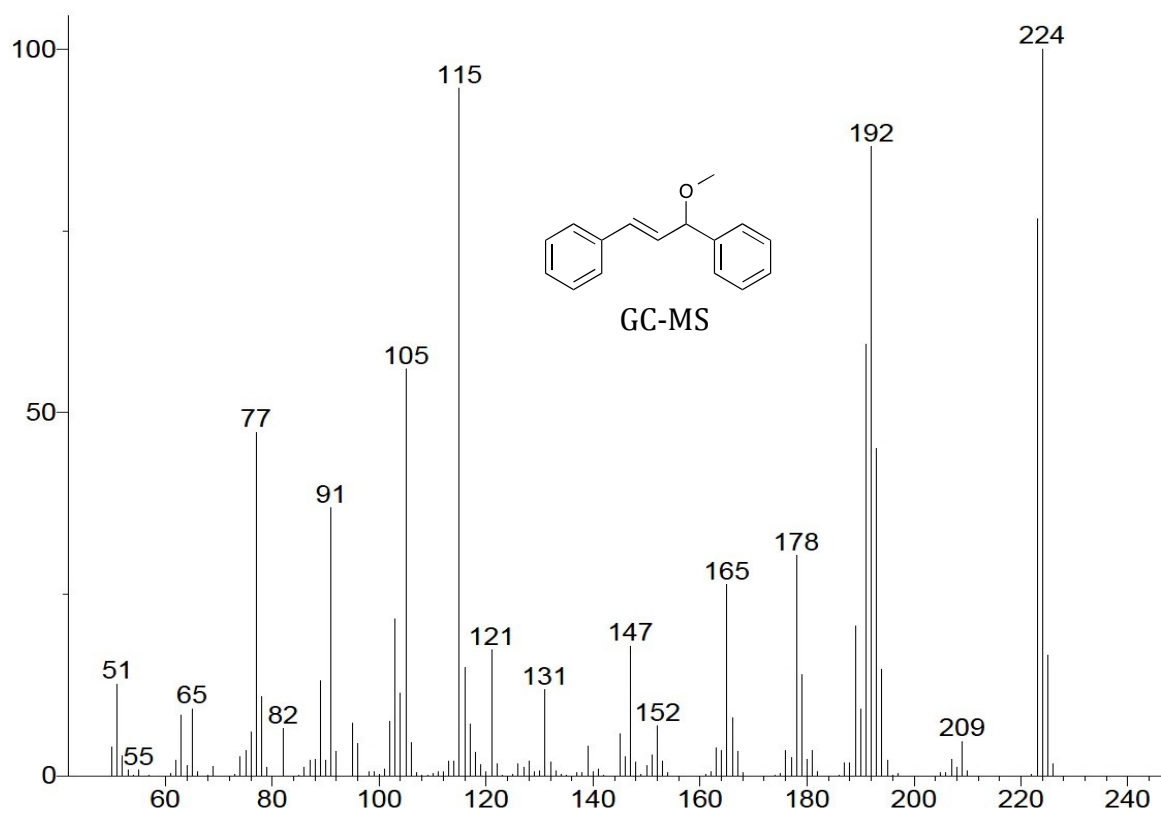

**(3)** *(E)*-3-ethoxy-1,3-diphenylprop-1-ene

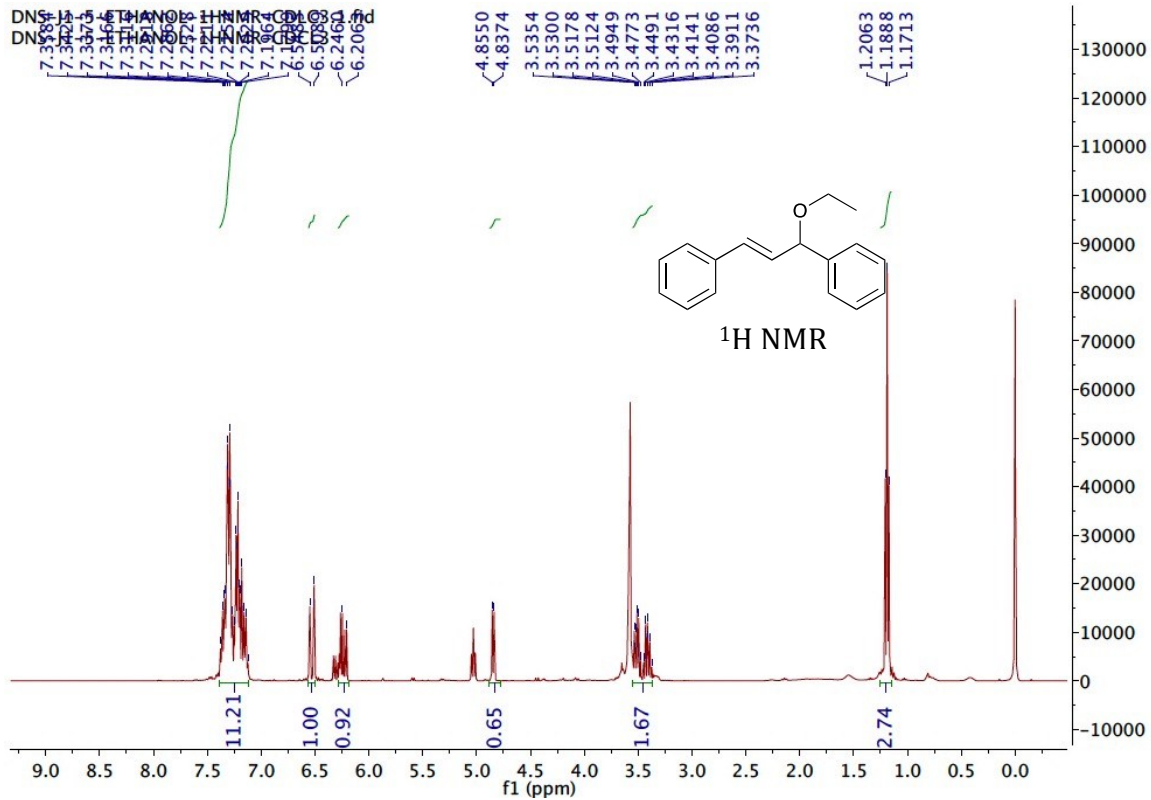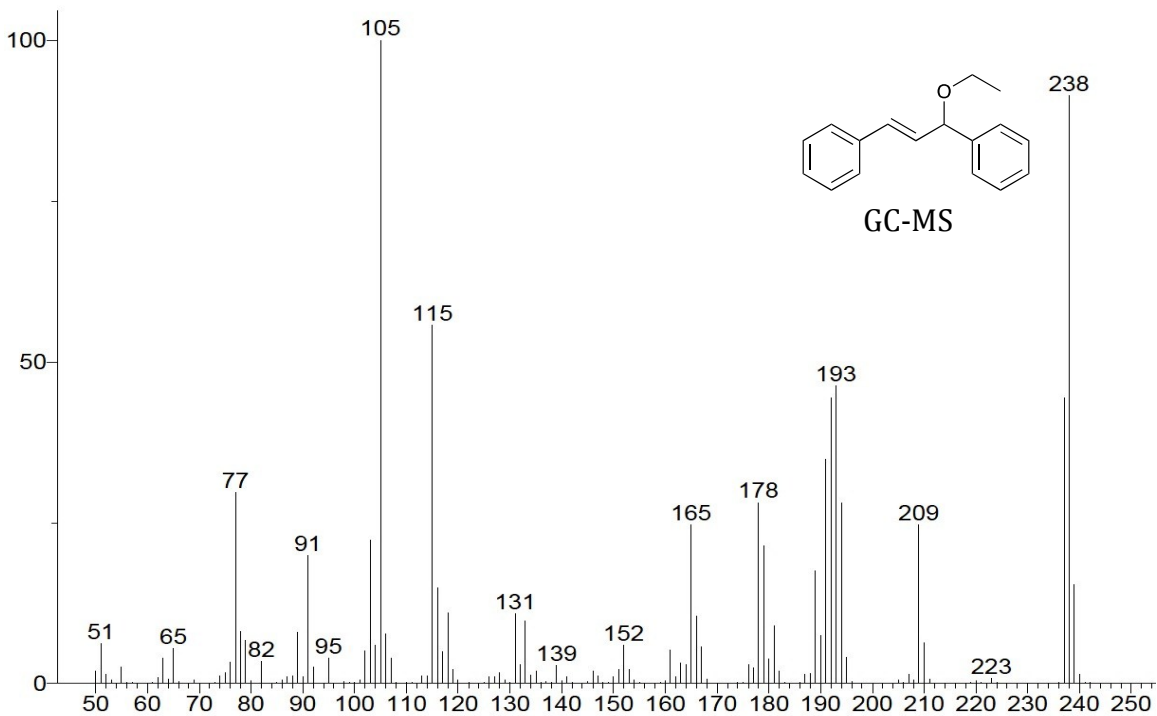

**(3m)** (*E*)-(3-butoxyprop-1-ene-1,3-diyl)dibenzene

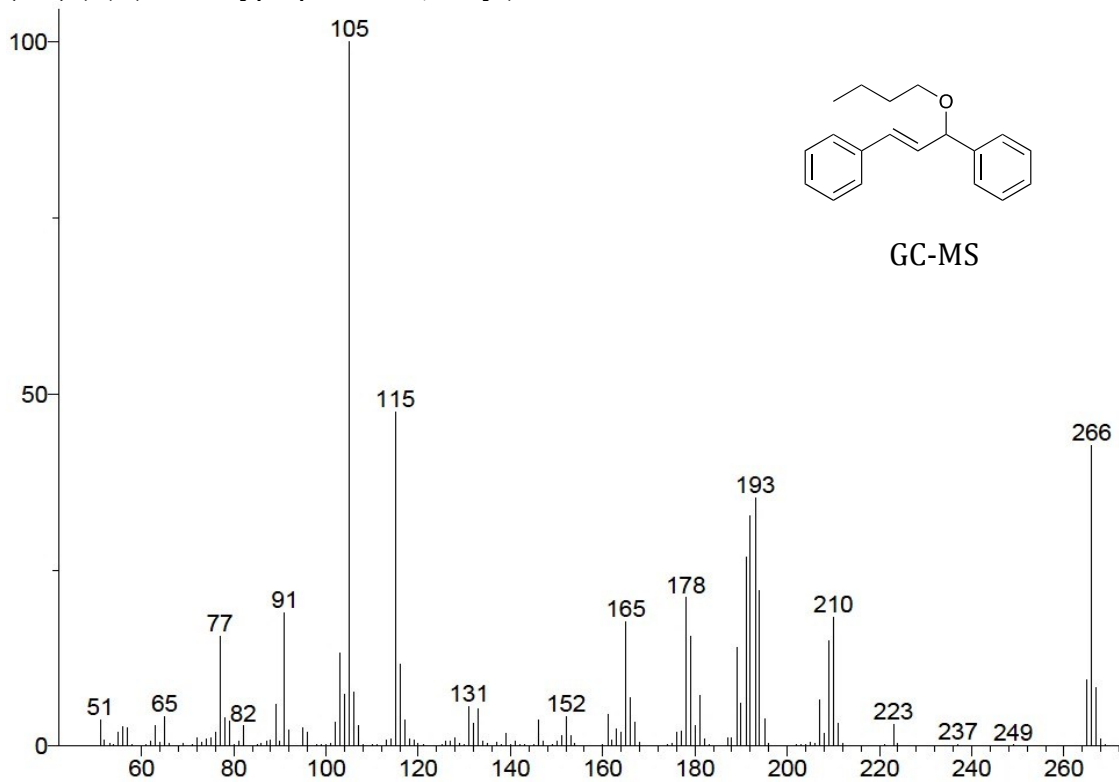

**(3n)** (*E*)-(3-isopropoxyprop-1-ene-1,3-diyl)dibenzene

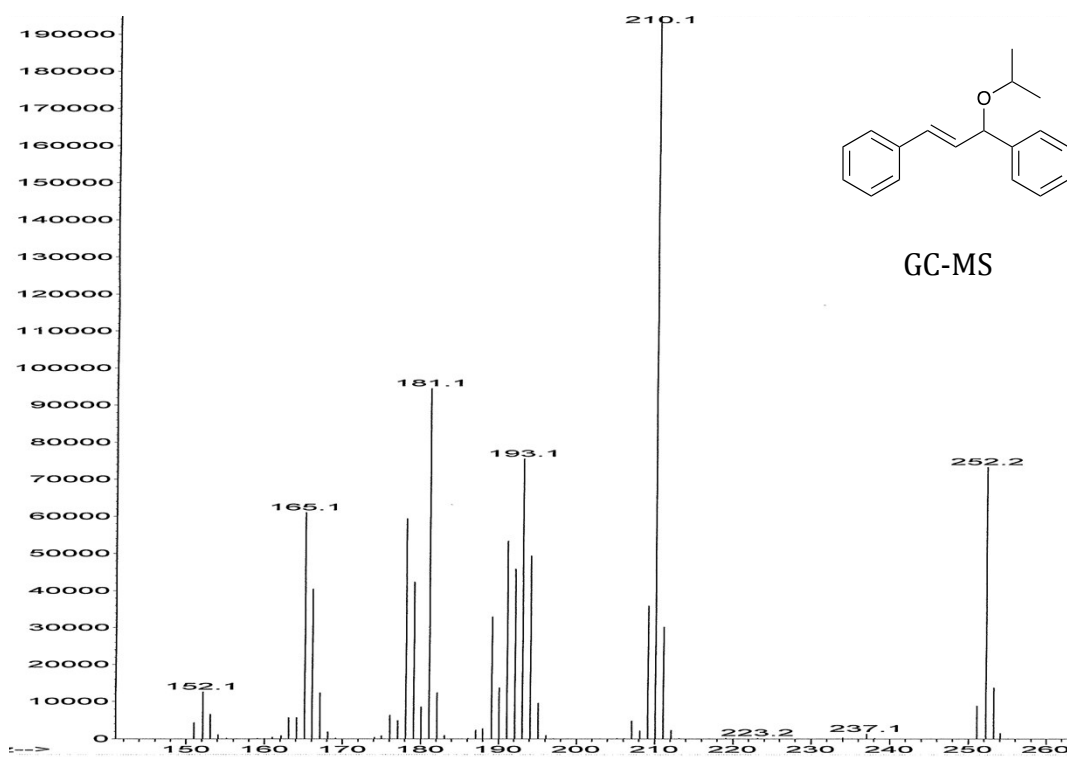

Supplement: c7gc03123h1.pdf [file c7gc03123h1.pdf]
